# Supplementary material for: Survival Benefits With Artificial Liver Support System for Acute-on-Chronic Liver Failure: A Time Series-Based Meta-Analysis
Source: PubMed Central journal article supplement (PMC4998263; doi:10.1097/md.0000000000002506), 2016-01-22
Supplement: medi-95-e2506-s001.pdf [file medi-95-e2506-s001.pdf]

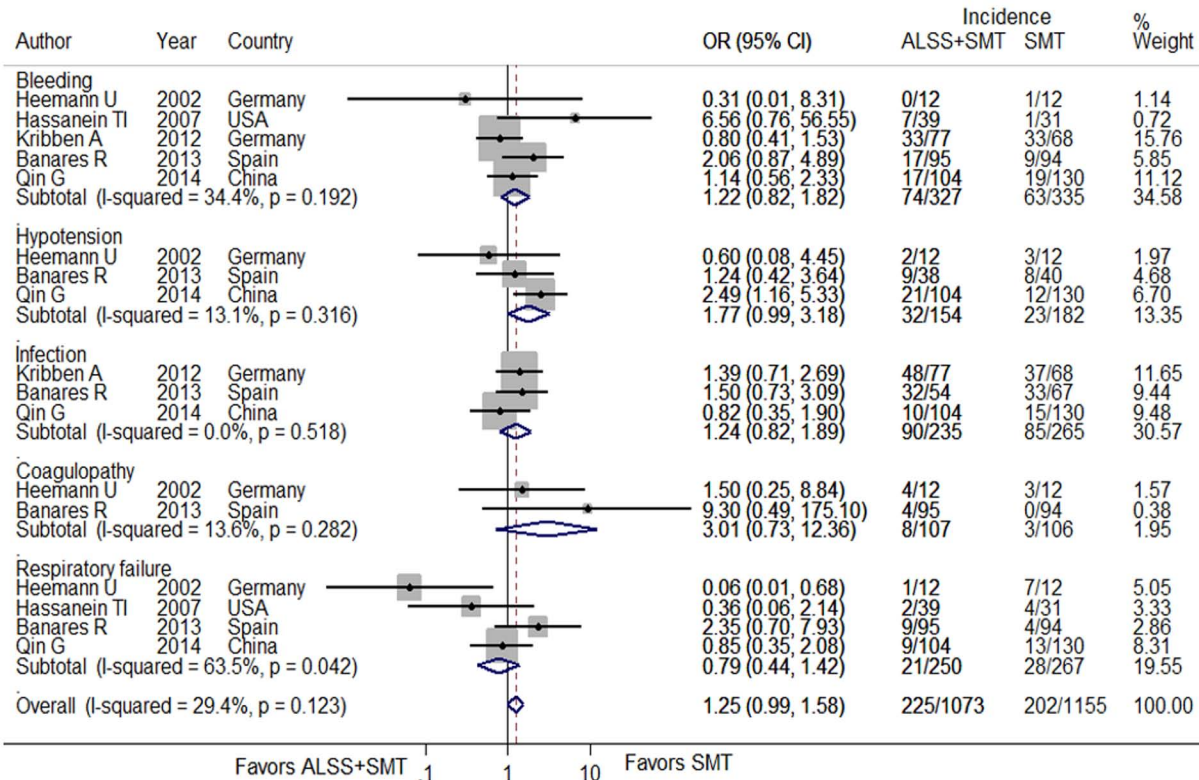

Figure s1

**A**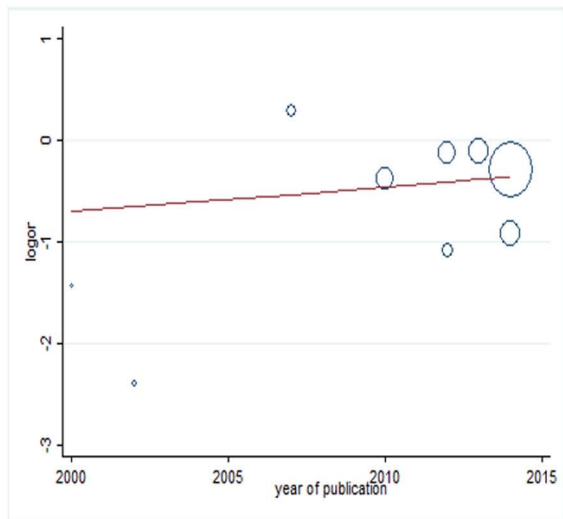**B**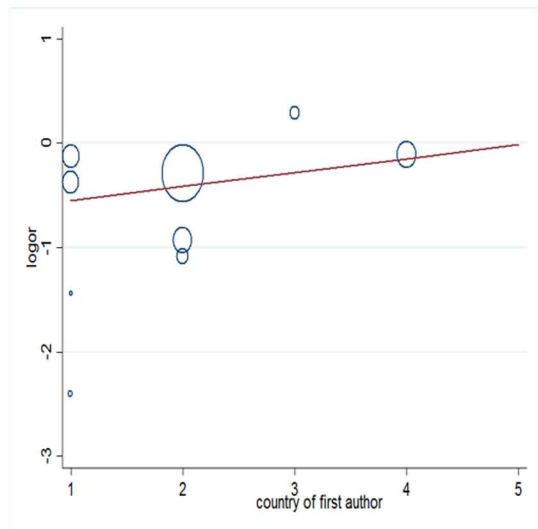**C**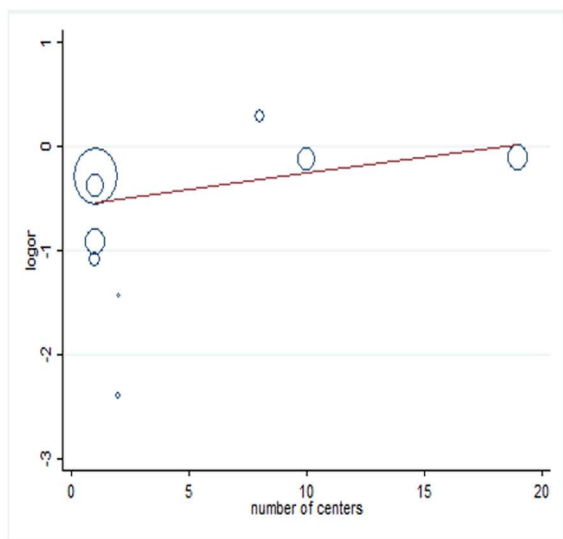**D**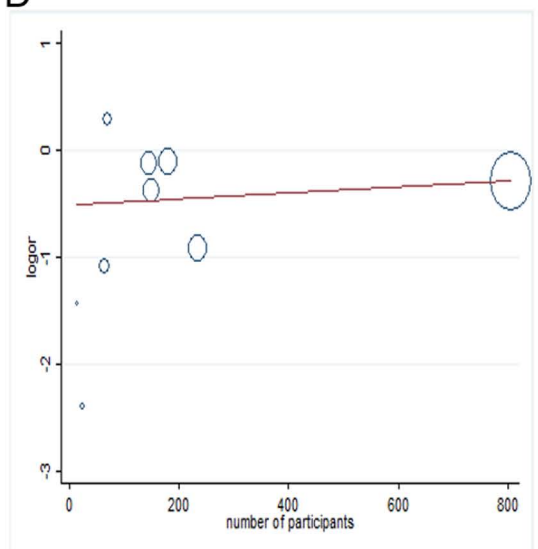**E**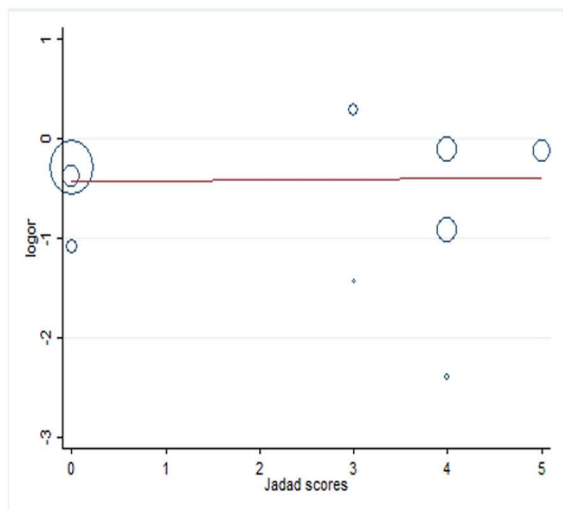**F**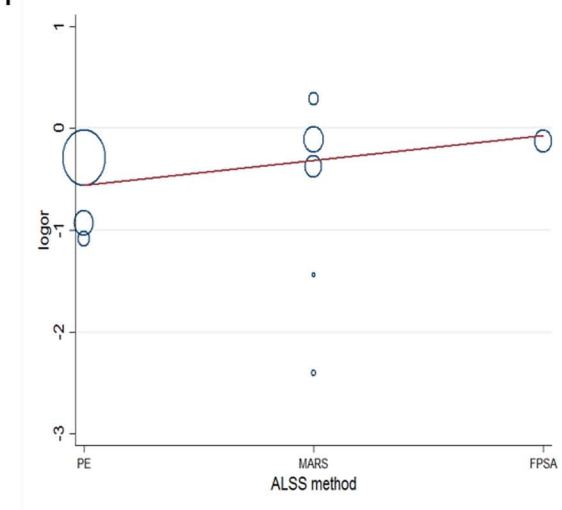**Figure s2**

Meta-analysis estimates, given named study is omitted

| Lower CI Limit      ○ Estimate      | Upper CI Limit

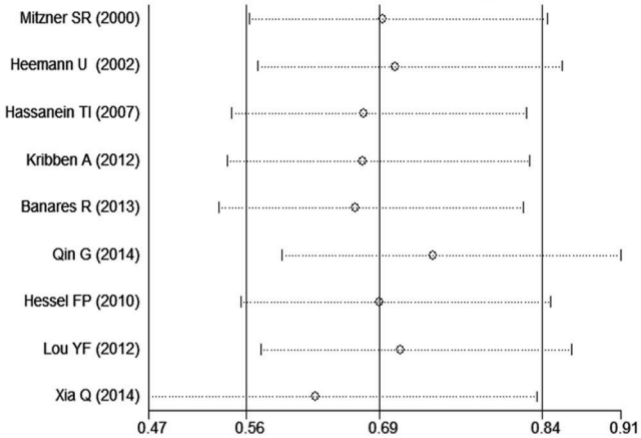

Figure s3

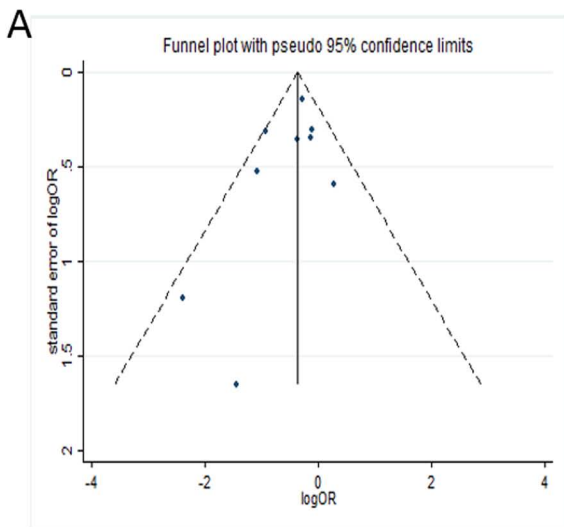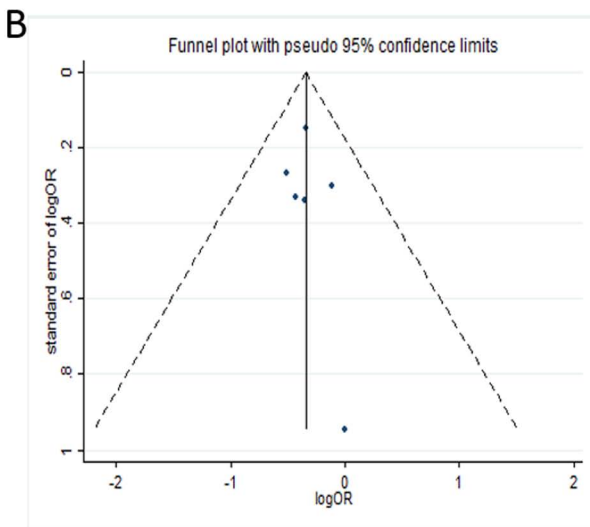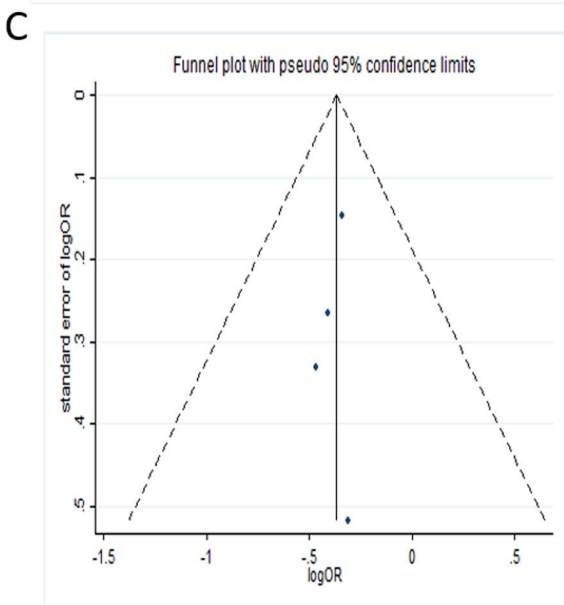

Figure s4

## Supplemental TABLES

**Table s1.** Definition and etiology of ACLF in the included studies

| Study               | Definition of acute-on-chronic liver failure                                                                                                                  | Etiology                                                                                                                 |
|---------------------|---------------------------------------------------------------------------------------------------------------------------------------------------------------|--------------------------------------------------------------------------------------------------------------------------|
| Mitzner SR (2000)   | CTP class C, total bilirubin >15 mg/dL, or HRS requiring hemodialysis.                                                                                        | Alcoholic liver disease, HBV, PBC, secondary biliary cirrhosis                                                           |
| Heeman U (2002)     | CTP class B or C, acute decompensation, or total bilirubin >20 mg/dL.                                                                                         | Alcoholic liver disease, HBV, HCV                                                                                        |
| Sen S (2004)        | Acute decompensation over 2-4 weeks, total bilirubin > 5.8 mg/dL, HE grade $\geq 2$ , or HRS (no response to SMT for 48 hours).                               | Alcoholic liver disease                                                                                                  |
| Hassanein TI (2007) | Presumptive diagnosis of cirrhosis, and HE grade $\geq 3$ .                                                                                                   | Alcoholic liver disease, HBV, HCV, cryptogenic cirrhosis, drug induced, AIH, PSC                                         |
| Kribben A (2012)    | Severe deterioration of chronic liver disease, total bilirubin $\geq 5$ mg/dL and CTP $\geq 10$                                                               | Alcoholic liver disease (56%), viral liver disease (20%), alcoholic and viral liver disease (7%), other etiologies (17%) |
| Banares R (2013)    | Presumptive diagnosis of cirrhosis, total bilirubin >5 mg/dL, and at least one of the following: HRS, HE grade 2-4, or total bilirubin >20 mg/dL.             | Alcohol (82%), HCV, HBV, AIH, PBC, PSC, NASH, drug toxicity, Wilson disease, etc.                                        |
| Qin G (2014)        | Presumptive diagnosis of CHB, HBV-associated cirrhosis, or HBsAg carrier; total bilirubin >10 mg/dL, within 28 days from symptom onset; INR >1.5 or PTA <40%. | HBV                                                                                                                      |
| Hessel FP (2010)    | Acute deterioration in liver function over 2-4 weeks, total bilirubin >300 $\mu\text{mol/L}$ , no response to SMT for 48 hours                                | Alcoholic-related (71%), infections (18%), intoxications (5%), others/unknown (6%)                                       |
| Lou YF (2012)       | Chronic liver disease, positive HBV-DNA with a history of known HBsAg positivity >6 months, total bilirubin >171 $\mu\text{mol/L}$ , PTA <40%, HE grade 2-4   | HBV                                                                                                                      |

|             |                                                                                                                                                                   |                                                                                                                    |
|-------------|-------------------------------------------------------------------------------------------------------------------------------------------------------------------|--------------------------------------------------------------------------------------------------------------------|
| Xia Q(2014) | Acute deterioration of pre-existing chronic liver disease, total bilirubin $\geq 10$ mg/dL or a daily elevation $\geq 1$ mg/dL, PTA $\leq 40\%$ or INR $> 1.50$ . | HBV alone or combined with another cause (91%), alcohol abuse (4%), autoimmune (1%), cholestatic (1%), others (3%) |
|-------------|-------------------------------------------------------------------------------------------------------------------------------------------------------------------|--------------------------------------------------------------------------------------------------------------------|

---

HRS, hepatorenal syndrome; HE, hepatic encephalopathy; HCV, hepatitis C virus; HBV, hepatitis B virus; AIH, autoimmune hepatitis; PBC, primary biliary cirrhosis; PSC, primary sclerosing cholangitis; NASH, nonalcoholic steatohepatitis; CTP, Child-Turcotte-Pugh; PTA, prothrombin time activity; CHB, chronic hepatitis B; HBsAg, hepatitis B surface antigen; INR, international normalized ratio; PSC, primary sclerosing cholangitis.

**Table s2.** Inclusion and exclusion criteria in the included studies

| Study             | Inclusion criteria                                                                                                                                                                                                                                                                                                                                                                                     | Exclusion criteria                                                                                                                                                                                                                                                                                                                                                                                     |
|-------------------|--------------------------------------------------------------------------------------------------------------------------------------------------------------------------------------------------------------------------------------------------------------------------------------------------------------------------------------------------------------------------------------------------------|--------------------------------------------------------------------------------------------------------------------------------------------------------------------------------------------------------------------------------------------------------------------------------------------------------------------------------------------------------------------------------------------------------|
| Mitzner SR (2000) | (1) Ascites and clinical, biochemical, and ultrasonographic signs of liver cirrhosis;<br>(2) hyperbilirubinemia (TBIL > 15 mg/dL);<br>(3) HE (grade I-IV).                                                                                                                                                                                                                                             | (1) Fulminant hepatic failure;<br>(2) sepsis unresponsive to antibiotic treatment;<br>(3) severe acute hemorrhages;<br>(4) malignancies;<br>(5) obstructive/chronic renal failure;<br>(6) pregnancy;<br>(7) severe cardiopulmonary disease.                                                                                                                                                            |
| Heeman U (2002)   | (1) Aged between 18 and 65 years old;<br>(2) cirrhosis (CTP 7 and higher);<br>(3) superimposed acute liver injury leading to decompensation and severe hyperbilirubinemia (TBIL > 20 mg/dL).                                                                                                                                                                                                           | (1) Hepatobiliary obstruction;<br>(2) inability to undergo the extracorporeal treatment because of active bleeding or sepsis causing hemodynamic instability;<br>(3) comorbid conditions associated with a poor outcome (as necrotic pancreatitis, cancer or cardiopulmonary failure);<br>(4) coma of nonhepatic origin;<br>(5) extensive surgery during the month before admission;<br>(6) pregnancy. |
| Sen S (2004)      | (1) Acute deterioration in liver function over 2-4 weeks with a defined inflammation-related precipitant (infection or alcoholic hepatitis) leading to severe progressive clinical deterioration despite supportive care (over 48 hours) with increasing jaundice (TBIL > 100 µmol/L);<br>(2) HE (Grade 2) or HRS;<br>(3) clinical, radiological, biochemical, and histological evidence of cirrhosis. | (1) Age < 18 or >75 years;<br>(2) lack of consent/assent;<br>(3) prior enrollment in another study;<br>(4) known hepatic/extrahepatic malignancy;<br>(5) uncontrolled infection or UGIB over the previous 48 hours;<br>(6) pregnancy;<br>(7) prior treatment with terlipressin for HRS,<br>(8) coexisting HIV infection;                                                                               |

---

|                        |                                                                                                                                                                                                                                                                                                                                                                                     |                                                                                                                                                                                                                                                                                                                                                                                                                                                                                                             |
|------------------------|-------------------------------------------------------------------------------------------------------------------------------------------------------------------------------------------------------------------------------------------------------------------------------------------------------------------------------------------------------------------------------------|-------------------------------------------------------------------------------------------------------------------------------------------------------------------------------------------------------------------------------------------------------------------------------------------------------------------------------------------------------------------------------------------------------------------------------------------------------------------------------------------------------------|
| Hassanein<br>TI (2007) | (1) 18 years of age or older;<br>(2) cirrhosis and HE grade 3 or 4.                                                                                                                                                                                                                                                                                                                 | <p>(9) severe cardiorespiratory disease.</p> <p>(1) Active hemorrhage;<br/>(2) hemodynamic instability;<br/>(3) acute cardiopulmonary complications (pulmonary edema, massive aspiration pneumonia, heart failure);<br/>(4) pregnancy;<br/>(5) active renal replacement therapy;<br/>(6) drug intoxication;<br/>(7) irreversible brain damage;<br/>(8) nonhepatic causes of altered mental status;<br/>(9) acute liver failure;<br/>(10) hepatocellular carcinoma;<br/>(11) liver transplant recipient.</p> |
| Kribben A<br>(2012)    | Severe deterioration of chronic liver disease with TBIL $\geq 5$ mg/dL and CTP $\geq 10$                                                                                                                                                                                                                                                                                            | <p>(1) Circulatory shock;<br/>(2) persistent bleeding;<br/>(3) INR <math>\geq 3</math>, or platelet count <math>\leq 30,000/\mu\text{L}</math>.</p>                                                                                                                                                                                                                                                                                                                                                         |
| Banares R<br>(2013)    | <p>(1) Existence of a presumptive diagnosis of cirrhosis;<br/>(2) an identifiable triggering event;<br/>(3) an increase of TBIL greater than 5 mg/dL;<br/>(4) at least one of the following findings: HRS, HE equal or greater than grade II; rapidly progressive hyperbilirubinemia (defined as a more than 50% increase from TBIL levels at admission) greater than 20 mg/dL.</p> | <p>(1) Progressive jaundice as a consequence of the natural course of cirrhosis or extrahepatic cholestasis;<br/>(2) platelet count less than <math>50,000/\text{mm}^3</math>;<br/>(3) INR <math>&gt; 2.3</math>;<br/>(4) suspected or evident DIC;<br/>(5) need for renal replacement therapy or intrinsic renal disease;<br/>(6) uncontrolled infection;<br/>(7) active bleeding;<br/>(8) HCC <math>&gt; 4</math> cm in diameter or tumoral and nontumoral portal vein thrombosis;</p>                    |

---



|                     |                                                                                                                                                                                                                                                                                                                                                                                                                                                                                                      |                                                                                                                                                                                                                                                                                                                                                                                                                                                                                                                    |
|---------------------|------------------------------------------------------------------------------------------------------------------------------------------------------------------------------------------------------------------------------------------------------------------------------------------------------------------------------------------------------------------------------------------------------------------------------------------------------------------------------------------------------|--------------------------------------------------------------------------------------------------------------------------------------------------------------------------------------------------------------------------------------------------------------------------------------------------------------------------------------------------------------------------------------------------------------------------------------------------------------------------------------------------------------------|
| Qin G<br>(2014)     | <p>(1) Age between 18 and 70 years of age;</p> <p>(2) presumptive diagnosis of CHB, HBV-associated cirrhosis, or HBsAg carrier;</p> <p>(3) rapidly progressive hyperbilirubinemia with TBIL &gt;10 mg/dL, within 28 days from symptom onset;</p> <p>(4) coagulopathy with INR &gt;1.5 or PTA &lt;40%.</p>                                                                                                                                                                                            | <p>(9) severe cardiopulmonary disease;</p> <p>(10) hemodynamic instability;</p> <p>(11) major surgical procedure within the last 4 weeks;</p> <p>(12) HIV infection.</p> <p>(1) Acute HBV infection;</p> <p>(2) superinfection with other viruses (hepatitis E, A, D, or C);</p> <p>(3) superinfection with HIV;</p> <p>(4) other causes of chronic liver failure such as alcohol- or drug-induced liver injury;</p> <p>(5) severe gastrointestinal bleeding;</p> <p>(6) coexistent HCC;</p> <p>(7) pregnancy.</p> |
| Hessel FP<br>(2010) | <p>Acute deterioration in liver function over 2-4 weeks with a defined inflammation-related precipitant (infection or alcoholic hepatitis) leading to severe progressive clinical, deterioration despite supportive care (over 48 h) with increasing jaundice (<math>\geq 300 \mu\text{mol/L}</math> at least once within a 7 day course) and a hospital stay of more than 6 days.</p>                                                                                                               | <p>(1) Severe gastrointestinal bleeding;</p> <p>(2) waiting list for liver transplantation;</p> <p>(3) known carcinoma;</p> <p>(4) other severe comorbidities.</p>                                                                                                                                                                                                                                                                                                                                                 |
| Lou YF<br>(2012)    | <p>(1) Significant asthenia, extreme anorexia, vomiting and abdominal distention;</p> <p>(2) rapidly increased blood bilirubin with total bilirubin &gt;171 <math>\mu\text{mol/L}</math>;</p> <p>(3) PTA &lt;40%;</p> <p>(4) symptoms of chronic liver disease, including splenomegaly, atrophy of the right lobe along with enlargement of the left lobe and varices or collaterals on ultrasonography or CT;</p> <p>(5) positive HBV-DNA with a history of known HBsAg positivity &gt;6 months</p> | <p>(1) Acute liver failure;</p> <p>(2) graft non-function after liver transplantation;</p> <p>(3) uncontrolled systemic or intracranial bleeding;</p> <p>(4) brain stem herniation;</p> <p>(5) severe hypotension; angiotensin-converting enzyme inhibitors in use and pregnancy. Concurrence of HCV, HDV, HGV, HIV infections;</p> <p>(6) AILD.</p>                                                                                                                                                               |

---

(6) established diagnose of stage II or higher HE.

Xia Q  
(2014)

(1) Acute deterioration of pre-existing chronic liver disease;

(2) extreme fatigue with severe digestive symptoms, such as obvious anorexia, abdominal distension or nausea and vomiting;

(3) TBIL  $\geq 10$  mg/dL or a daily elevation  $\geq 1$  mg/dL;

(4) PTA  $\leq 40\%$  (PT  $\geq 18.3$  s or INR  $> 1.50$ ).

(1) Significant cardiopulmonary comorbidity;

(2) intrinsic renal disease;

(3) other comorbidities such as diabetes or hypothyroidism;

(4) failure to meet the Chinese criteria for ACLF.

---

TBIL, total bilirubin; HE, hepatic encephalopathy; CTP, Child-Turcotte-Pugh index; HRS, hepatorenal syndrome; UGIB, upper gastrointestinal bleeding; HIV, human immunodeficiency virus; INR, international normalized ratio; DIC, disseminated intravascular coagulation; HCC, hepatocellular carcinoma; CHB, chronic hepatitis B; HBV, hepatitis B virus; HBsAg, hepatitis B surface antigen; HEV, hepatitis E virus; HAV, hepatitis A virus; HDV, hepatitis D virus; HCV, hepatitis C virus; PTA, prothrombin time activity; ACEI, angiotensin-converting enzyme inhibitor; HGV, hepatitis G virus; AILD, autoimmune liver disease; PT, prothrombin time; ACLF, acute-on-chronic liver failure.

**Table s3.** Treatment characteristics in the included studies

| Study               | ALSS   |                                                |                             | Liver transplantation |               | <i>P</i> |
|---------------------|--------|------------------------------------------------|-----------------------------|-----------------------|---------------|----------|
|                     | Method | No. of ALSS sessions<br>(Duration per session) | Blood Flow Rate<br>(ml/min) | ALSS group            | Control group |          |
| Mitzner SR (2000)   | MARS   | 5.25 ± 3.62 sessions (6-8 h)                   | 2 to 3 mg/kg/min            | 0/8                   | 0/5           |          |
| Heeman U (2002)     | MARS   | up to 10 treatments (6 h)                      | 200 mL/min.                 | 1/12                  | 1/12          | > 0.05   |
| Sen S (2004)        | MARS   | 4 sessions (4 h)                               | NR                          | NR                    | NR            |          |
| Hassanein TI (2007) | MARS   | 2.7±1.5 sessions (4 h)                         | 210 (170-500) mL/min        | 0/24                  | 0/25          |          |
| Kribben A (2012)    | FPSA   | Mean of 8.1 sessions (5.7±1.3 h)               | NR                          | 21/77                 | 13/68         | > 0.05   |
| Banares R (2013)    | MARS   | Up to 10 sessions (6-8 h)                      | 100-250 mL/min              | 3/90                  | 3/89          | > 0.05   |
| Qin G (2014)        | PE     | average 2 sessions (NR)                        | 25-30mL/min                 | 0/104                 | 2/130         | > 0.05   |
| Hessel FP (2010)    | MARS   | Mean of 8.7 sessions (NR)                      | NR                          | 0/67                  | 0/82          |          |
| Lou YF (2012)       | PE     | Average of 3.2 sessions (6 h)                  | 25-30mL/min                 | NR                    | NR            |          |
| Xia Q (2014)        | PE     | 2.65±1.32 sessions (NR)                        | NR                          | 60/380                | 9/407         | < 0.001  |

ALSS, artificial liver support system; MARS, molecular adsorbent recirculating system; NR, not reported; FPSA, fractionated plasma separation and adsorption; PE, plasma exchange.

**Table s4.** Adverse events in ALSS groups vs. control groups in the randomized trials

| Study               | Adverse events                      | ALSS group | Control group | <i>P</i> |
|---------------------|-------------------------------------|------------|---------------|----------|
| Heemann U (2002)    | Worsening of hepatic encephalopathy | 0/12       | 3/12          | 0.217    |
|                     | Electrolyte disorders               | 4/12       | 10/12         | 0.036    |
|                     | New formation of ascites            | 0/12       | 1/12          | 1.000    |
| Hassanein TI (2007) | Neurological                        | 5/39       | 2/31          | 0.452    |
|                     | Gastrointestinal and hepatic        | 8/39       | 7/31          | 1.000    |
|                     | Cardiovascular                      | 10/39      | 9/31          | 0.792    |
|                     | Hematologic                         | 4/39       | 2/31          | 0.687    |
|                     | Renal                               | 5/39       | 2/31          | 0.452    |
|                     | Systemic                            | 10/39      | 9/31          | 0.792    |
|                     | Catheter related                    | 6/39       | 0/31          | 0.030    |
| Kribben A (2012)    | Recurrent ascites                   | 39/77      | 38/68         | 0.617    |
| Banares R (2013)    | Pneumonia                           | 10/37      | 13/40         | 0.628    |
|                     | Death related infection             | 10/32      | 9/44          | 0.298    |
| Qin G (2014)        | Skin rash                           | 28/104     | 9/130         | <0.001   |
|                     | Hyperkalemia                        | 19/104     | 16/130        | 0.268    |
|                     | Pneumonia                           | 10/104     | 17/130        | 0.537    |
